# Supplementary material for: Microglena antarctica sp. nov. a New Antarctic Green Alga from Inexpressible Island (Terra Nova Bay, Ross Sea) Revealed through an Integrative Approach
Source: MDPI journal article supplement (doi:10.3390/d14050337), 2022-04-26
Supplement: s1 [file s1]

**Table S1.** List of species, strains and GenBank accession numbers of sequences used in this study

| Species                          | Strain       | GenBank Accession Numbers |          |
|----------------------------------|--------------|---------------------------|----------|
|                                  |              | ITS-2                     | 18S      |
| <i>Aphanochaete magnum</i>       | UTEX B 1909  | HQ646383                  | AF182816 |
| <i>Chaetophora incrassata</i>    | CCAP 413/1   | FR865749                  | FR865749 |
| <i>Microglena antarctica</i>     | ICE-L        | AY731085                  | AY731082 |
| <i>Microglena antarctica</i>     | ICE-W        | AY731084                  | AY731083 |
| <i>Microglena antarctica</i>     | CCCryo309-06 | HQ404898                  | -        |
| <i>Microglena antarctica</i>     | IMA076A      | OM791388                  | ON185622 |
| <i>Microglena reginae</i>        | SAG 17.89    | FR854388                  | FR854388 |
| <i>Microglena uva-maris</i>      | SAG 19.89    | FR854390                  | FR854390 |
| <i>Microglena basinuclata</i>    | SAG 67.72    | FR854374                  | FR854374 |
| <i>Microglena braunii</i>        | SAG 50.86    | FR854375                  | FR854375 |
| <i>Microglena charkoviensis</i>  | ACKU 267-03  | FR854376                  | FR854376 |
| <i>Microglena charkoviensis</i>  | ACKU 274-03  | FR854376                  | FR854376 |
| <i>Microglena coccifera</i>      | SAG 54.91    | FR854378                  | FR854378 |
| <i>Microglena coccifera</i>      | SAG 55.91    | FR854379                  | FR854379 |
| <i>Microglena globulifera</i>    | CCAC 0015    | FR854380                  | FR854380 |
| <i>Microglena globulifera</i>    | CCAC 0017    | FR854381                  | FR854381 |
| <i>Microglena indica</i>         | SAG 46.96    | FR854382                  | FR854382 |
| <i>Microglena lobata</i>         | SAG 31.72    | FR854383                  | FR854383 |
| <i>Microglena longirubra</i>     | SAG 5.92     | FR854384                  | FR854384 |
| <i>Microglena media</i>          | NIES-2743    | AB872922                  | AB694003 |
| <i>Microglena monadina</i>       | SAG 55.72    | FR854385                  | FR854385 |
| <i>Microglena opisthopyren</i>   | SAG 8.87     | FR854386                  | FR854386 |
| <i>Microglena opisthopyren</i>   | SAG 54.90    | FR854387                  | FR854387 |
| <i>Microglena opisthopyren</i>   | CCAP 11/46   | FR865587                  | FR865587 |
| <i>Microglena opisthopyren</i>   | NIES-2744    | AB872921                  | AB694004 |
| <i>Microglena redcarensis</i>    | SAG 18.89    | LC214872                  | LC214871 |
| <i>Microglena media</i>          | SAG 16.90    | FR854389                  | FR854389 |
| <i>Phacotus lenticularis</i>     | SAG 16.99    | AY009925                  | AY009897 |
| <i>Wislouchiella planctonica</i> | UTEX 1030    | AY009900                  | AF252547 |
