# Supplementary material for: Microglena antarctica sp. nov. a New Antarctic Green Alga from Inexpressible Island (Terra Nova Bay, Ross Sea) Revealed through an Integrative Approach
Source: MDPI journal article supplement (doi:10.3390/d14050337), 2022-04-26
Supplement: s1 [file s1]

**Table S2.** Compensatory base changes (CBCs) and uncorrected p-distances among the ITS-2 DNA barcodes of *Microglena*. The upper-right half of the table shows the total number of compensatory changes (CBC/Hemi-CBCs), while the lower-left half gives the uncorrected p-distances calculated in PAUP.

| Species                 | CBC                                  | <i>M. antarctica</i>                 | <i>M. charkoviensis</i>  | <i>M. coccifera</i>  | <i>M. opisthopyren</i> | <i>M. lobata</i> | <i>M. braunii</i> | <i>M. media</i> | <i>M. indica</i> | <i>M. basinucleata</i> | <i>M. monadina</i> | <i>M. globulifera</i> | <i>M. reginae</i> | <i>M. uva-maris</i> | <i>M. opisthopyren</i> | <i>M. redcarensis</i> | <i>M. media</i> | <i>M. longirubra</i> |
|-------------------------|--------------------------------------|--------------------------------------|--------------------------|----------------------|------------------------|------------------|-------------------|-----------------|------------------|------------------------|--------------------|-----------------------|-------------------|---------------------|------------------------|-----------------------|-----------------|----------------------|
| uncorrected p-distance  | strains                              | IMA076A; ICE-L; ICE-W; CCCryo 309-06 | ACKU 267-03; ACKU 274-03 | SAG 54.91; SAG 55.91 | SAG 8.87               | SAG 31.72        | SAG 50.86         | SAG 16.90       | SAG 46.96        | SAG 67.72              | SAG 55.72          | CCAC 0015; CCAC 0017  | SAG 17.89         | SAG 19.89           | NIES-2744              | SAG 18.89             | NIES-2743       | SAG 5.92             |
| <i>M. antarctica</i>    | IMA076A; ICE-L; ICE-W; CCCryo 309-06 | —                                    | 15 (9/6)                 | 13 (7/6)             | 17 (10/7)              | 19 (9/10)        | 21 (10/11)        | 18 (8/10)       | 19 (9/10)        | 17 (8/9)               | 17 (7/10)          | 18 (8/10)             | 18 (8/10)         | 16 (6/10)           | 17 (9/8)               | 11 (5/6)              | 18 (8/10)       | 16 (9/7)             |
| <i>M. charkoviensis</i> | ACKU 267-03; ACKU 274-03             | 0.19818                              | —                        | 5 (4/1)              | 6 (3/3)                | 7 (2/5)          | 10 (4/6)          | 7 (3/4)         | 10 (5/5)         | 13 (4/9)               | 5 (1/4)            | 9 (2/7)               | 12 (4/8)          | 13 (5/8)            | 6 (3/3)                | 13 (7/6)              | 9 (4/5)         | 10 (4/6)             |
| <i>M. coccifera</i>     | SAG 54.91; SAG 55.91                 | 0.20439                              | 0.09966                  | —                    | 1 (0/1)                | 5 (2/3)          | 6 (2/4)           | 6 (3/3)         | 9 (6/3)          | 11 (5/6)               | 4 (1/3)            | 7 (1/6)               | 9 (4/5)           | 12 (5/7)            | 2 (0/2)                | 11 (4/7)              | 6 (3/3)         | 4 (0/4)              |
| <i>M. opisthopyren</i>  | SAG 8.87                             | 0.21865                              | 0.06980                  | 0.02941              | —                      | 6 (2/4)          | 7 (2/5)           | 7 (3/4)         | 10 (6/4)         | 12 (7/5)               | 3 (1/2)            | 9 (3/6)               | 11 (6/5)          | 13 (7/6)            | 2 (0/2)                | 12 (6/6)              | 7 (3/4)         | 4 (1/3)              |
| <i>M. lobata</i>        | SAG 31.72                            | 0.22656                              | 0.08925                  | 0.09163              | 0.07591                | —                | 3 (2/1)           | 11 (2/9)        | 10 (2/8)         | 10 (6/4)               | 4 (2/2)            | 10 (1/9)              | 11 (3/8)          | 14 (5/9)            | 7 (2/5)                | 16 (5/11)             | 10 (2/8)        | 8 (3/5)              |
| <i>M. braunii</i>       | SAG 50.86                            | 0.24325                              | 0.11580                  | 0.08655              | 0.07161                | 0.04682          | —                 | 12 (3/9)        | 14 (5/9)         | 10 (5/5)               | 5 (2/3)            | 13 (3/10)             | 14 (5/9)          | 16 (6/10)           | 8 (2/6)                | 18 (6/12)             | 11 (3/8)        | 9 (3/6)              |
| <i>M. media</i>         | SAG 16.90                            | 0.21365                              | 0.10320                  | 0.11386              | 0.08494                | 0.10999          | 0.14542           | —               | 4 (1/3)          | 12 (5/7)               | 8 (3/5)            | 11 (3/8)              | 12 (5/7)          | 15 (7/8)            | 7 (3/4)                | 13 (6/7)              | 1 (0/1)         | 11 (3/8)             |
| <i>M. indica</i>        | SAG 46.96                            | 0.23060                              | 0.11329                  | 0.14203              | 0.11814                | 0.10609          | 0.14720           | 0.05314         | —                | 13 (6/7)               | 9 (4/5)            | 12 (4/8)              | 12 (6/6)          | 16 (8/8)            | 8 (6/2)                | 14 (7/7)              | 3 (1/2)         | 14 (6/8)             |
| <i>M. basinucleata</i>  | SAG 67.72                            | 0.20679                              | 0.13654                  | 0.15406              | 0.15020                | 0.14156          | 0.12581           | 0.14967         | 0.14962          | —                      | 5 (3/2)            | 16 (5/11)             | 14 (7/7)          | 13 (6/7)            | 11 (6/5)               | 15 (7/8)              | 12 (5/7)        | 12 (6/6)             |
| <i>M. monadina</i>      | SAG 55.72                            | 0.20264                              | 0.04942                  | 0.05792              | 0.03312                | 0.06396          | 0.05829           | 0.09970         | 0.10473          | 0.07864                | —                  | 9 (2/7)               | 9 (3/6)           | 10 (4/6)            | 3 (1/2)                | 14 (5/9)              | 8 (3/5)         | 6 (1/5)              |
| <i>M. globulifera</i>   | CCAC 0015; CCAC 0017                 | 0.22084                              | 0.08170                  | 0.08114              | 0.08786                | 0.09668          | 0.12774           | 0.11591         | 0.11990          | 0.16785                | 0.09284            | —                     | 10 (3/7)          | 15 (6/9)            | 10 (2/8)               | 16 (8/8)              | 11 (3/8)        | 11 (2/9)             |
| <i>M. reginae</i>       | SAG 17.89                            | 0.19848                              | 0.14844                  | 0.14443              | 0.14934                | 0.14435          | 0.16822           | 0.15068         | 0.16164          | 0.18411                | 0.13052            | 0.11659               | —                 | 14 (9/5)            | 11 (5/6)               | 15 (7/8)              | 12 (6/6)        | 9 (4/5)              |
| <i>M. uva-maris</i>     | SAG 19.89                            | 0.17233                              | 0.14784                  | 0.16281              | 0.15591                | 0.15239          | 0.16701           | 0.17539         | 0.18602          | 0.15894                | 0.12017            | 0.16289               | 0.17782           | —                   | 11 (6/5)               | 14 (5/9)              | 14 (6/8)        | 14 (7/7)             |
| <i>M. opisthopyren</i>  | NIES-2744                            | 0.21023                              | 0.06982                  | 0.04357              | 0.01452                | 0.08388          | 0.07907           | 0.08430         | 0.10321          | 0.13491                | 0.03407            | 0.08755               | 0.14125           | 0.14699             | —                      | 12 (6/6)              | 6 (3/3)         | 5 (0/5)              |
| <i>M. redcarensis</i>   | SAG 18.89                            | 0.11230                              | 0.18825                  | 0.17312              | 0.16705                | 0.19173          | 0.20699           | 0.17402         | 0.19444          | 0.18974                | 0.16668            | 0.21519               | 0.19735           | 0.14330             | 0.16614                | —                     | 13 (6/7)        | 15 (7/8)             |
| <i>M. media</i>         | NIES-2743                            | 0.21396                              | 0.11311                  | 0.11269              | 0.08531                | 0.10286          | 0.13828           | 0.00761         | 0.04503          | 0.14692                | 0.10074            | 0.11529               | 0.15765           | 0.17150             | 0.07539                | 0.17380               | —               | 11 (3/8)             |
| <i>M. longirubra</i>    | SAG 5.92                             | 0.19868                              | 0.10739                  | 0.05102              | 0.03789                | 0.09900          | 0.09431           | 0.11720         | 0.15034          | 0.14719                | 0.05801            | 0.09556               | 0.13558           | 0.16338             | 0.03744                | 0.17934               | 0.11677         | —                    |
